# Supplementary material for: Single-agent rituximab is an effective salvage therapy in pretreated patients with hairy cell leukemia
Source: PubMed Central journal article supplement — Blood Adv. 2023 Sep 23;7(21):6762–6. doi: 10.1182/bloodadvances.2023010742 (PMC10659999; doi:10.1182/bloodadvances.2023010742), 2023-09-23

# RESEARCH LETTER

## Supplementary material

**Single-agent rituximab is an effective salvage therapy in pretreated hairy cell leukemia patients.**

Alessandro Broccoli,<sup>1,2</sup> Lisa Argnani,<sup>2</sup> Laura Nanni,<sup>1,2</sup> Vittorio Stefoni,<sup>1,2</sup> Cinzia Pellegrini,<sup>1</sup> Beatrice Casadei,<sup>1</sup> Gabriele Gugliotta,<sup>1</sup> Matteo Carella,<sup>1,2</sup> Paolo Elia Coppola,<sup>1,2</sup> Gianmarco Bagnato,<sup>1,2</sup> and Pier Luigi Zinzani<sup>1,2</sup>

<sup>1</sup>IRCCS Azienda Ospedaliero-Universitaria di Bologna, Istituto di Ematologia “Seràgnoli”, Bologna, Italy.

<sup>2</sup>Dipartimento di Scienze Mediche e Chirurgiche, Università di Bologna, Bologna, Italy

### Supplementary methods

Patients were judged in complete response (CR) if they stringently met the Consensus Resolution criteria for CR in peripheral blood (hemoglobin at least 12 g/dL, platelet counts higher than 100,000/mm<sup>3</sup> and neutrophil counts higher than 1,500/mm<sup>3</sup>, no circulating hairy cells) and in the bone marrow (complete disappearance of hairy cell infiltrates with hematoxylin-eosin staining, along with an immunohistochemical CD20 positivity lower than or equal to 10% of marrow

cellularity) and with no residual organomegaly. PR required the resolution of all peripheral blood cytopenias, with the persistence of at least 5% of circulating hairy cells or the reduction of at least 50% of the bone marrow leukemic infiltrate or of any previously detected organomegaly. Minimal response (MR) indicated a peripheral blood hematological improvement in at least one among hemoglobin concentration, platelet counts, neutrophil counts, without the clearance of circulating hairy cells (yet needed to be less than 50% of the initial circulating burden). Patients were classified as non-responder if failed to achieve at least a minor response.

The main study objectives were the overall response rate (ORR) to rituximab, which indicated the proportion of patients achieving a CR, a PR or a MR; the time-to-next treatment (TTNT), calculated from the date of rituximab start to the moment in which a subsequent treatment was initiated; progression-free survival (PFS) and overall survival (OS). TTNT was calculated on all courses of rituximab received in order to capture the efficacy of the drug even when repeated twice or more times. PFS and OS, instead, were calculated on all patients from the time of rituximab inception to the first documented disease progression, death or last follow-up visit.

Demographics and patients' characteristics were summarized by descriptive statistics and survival functions were estimated by using the Kaplan–Meier method and compared using log-rank test. Statistical analyses were performed with Stata 17 (StataCorp LP, TX).

The study was approved by our institutional board (Ethical Committee AVEC of Bologna, approval id 1043/2021/Oss/AOUBo). All participants gave written informed consent (when applicable) in accordance with the Declaration of Helsinki to

retrospectively collect their data. As for the retrospective design of the study, we received an authorization to analyze data also of patients who were deceased or lost to follow up at the time of data collection.

**Supplementary table.** Published experiences with single-agent rituximab in pretreated hairy cell leukemia patients

| Author, year                   | Patients | Previous lines | Rituximab schedule                   | ORR | CR  | Median duration of response |
|--------------------------------|----------|----------------|--------------------------------------|-----|-----|-----------------------------|
| Lauria, 2001 <sup>12</sup>     | 10       | —              | 375 mg/m <sup>2</sup> × 4 weeks      | 50% | 10% | —                           |
| Hagberg, 2001 <sup>14</sup>    | 8        | 3              | 375 mg/m <sup>2</sup> × 4 weeks      | 75% | 62% | 14 months                   |
| Nieva, 2003 <sup>15</sup>      | 24       | 1              | 375 mg/m <sup>2</sup> × 4 weeks      | 26% | 13% | —                           |
| Thomas, 2003 <sup>16</sup>     | 15       | 1              | 375 mg/m <sup>2</sup> × 8 weeks      | 80% | 67% | 42 months                   |
| Zenhäusern, 2008 <sup>17</sup> | 26       | 1              | 375 mg/m <sup>2</sup> × 4 weeks      | 80% | 32% | 37 months                   |
| Leclerc, 2015 <sup>18</sup>    | 24 (*)   | —              | 375 mg/m <sup>2</sup> × 4 or 8 weeks | 79% | 54% | 23 months                   |
| This study                     | 33 (**)  | 2              | 375 mg/m <sup>2</sup> × 4 weeks      | 72% | 28% | 33 months (***)             |

(\*) Only patients treated with single-agent rituximab at relapse. (\*\*) It includes 5 patients treated more than once (39 courses overall).

(\*\*\*) Time-to-next treatment.

ORR, overall response rate; CR, complete response

References in the table are to the main text.

# Single-agent rituximab is an effective salvage therapy in pretreated hairy cell leukemia patients

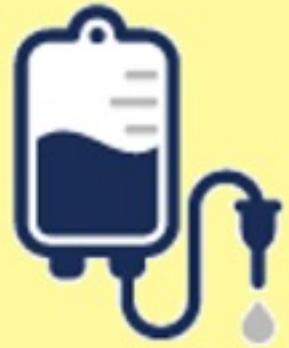

33 patients with relapsed/refractory HCL  
39 rituximab courses

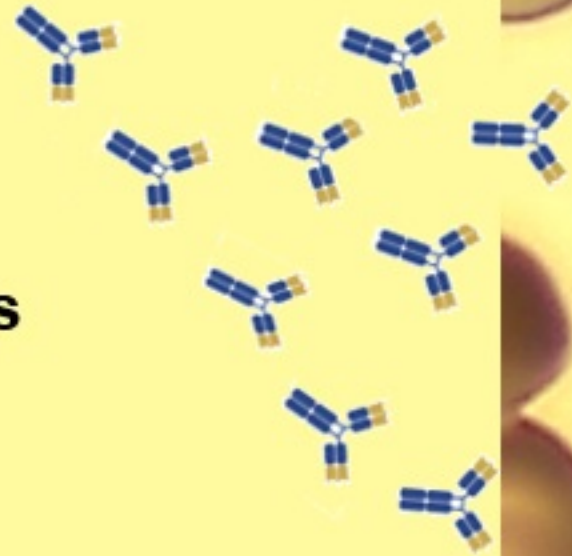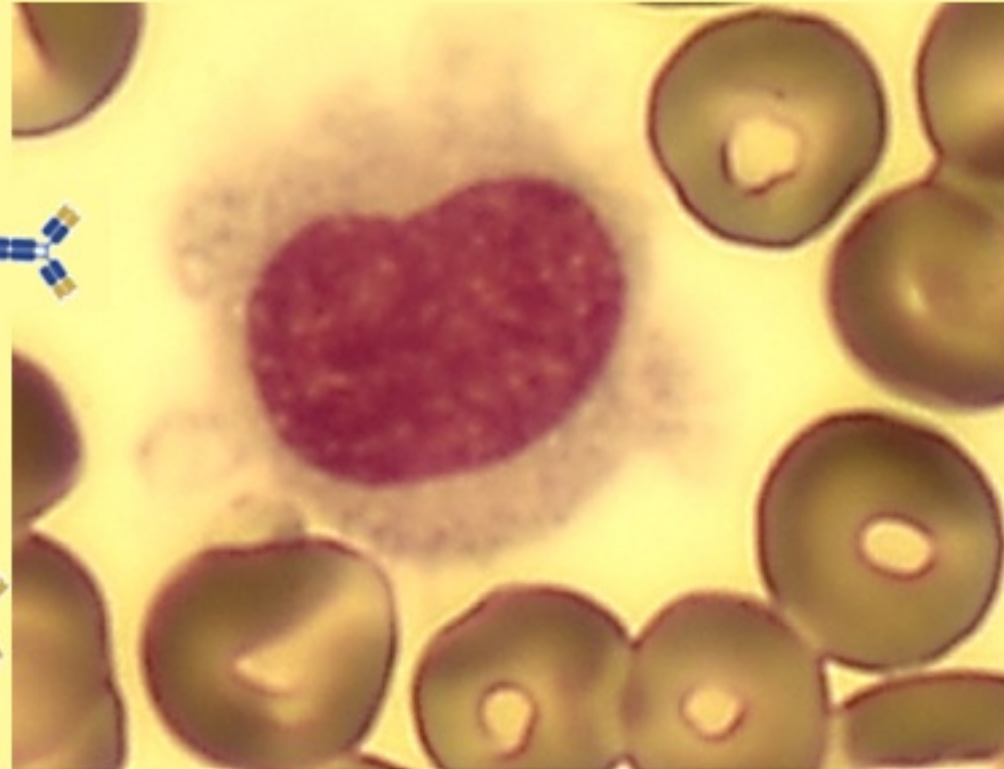

Rituximab  
375 mg/m<sup>2</sup>  
Weekly, 4 weeks

- Median third line of therapy in multiply treated patients

- Overall response rate: 71.8%

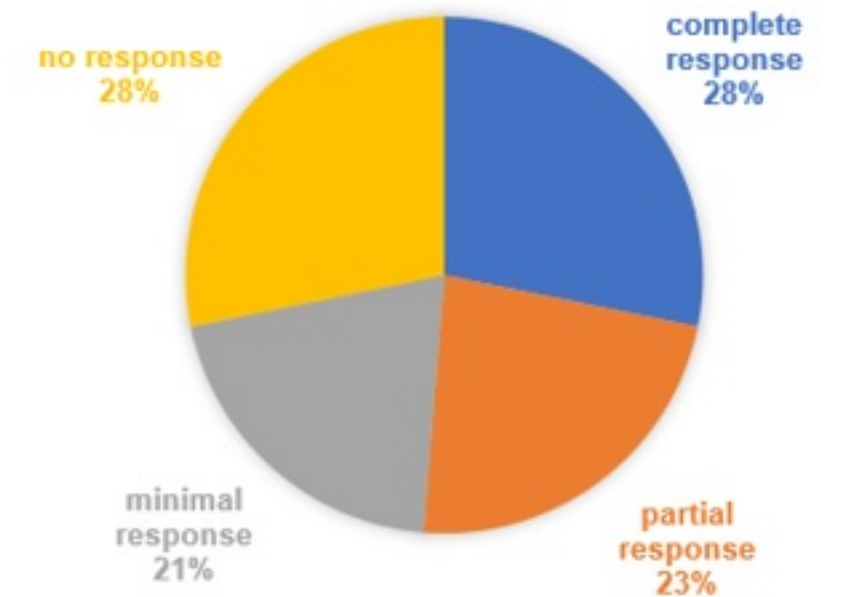

- Median time-to-next treatment: 33 months ▶
- Median progression-free survival: 24 months
- Median overall survival: 154 months

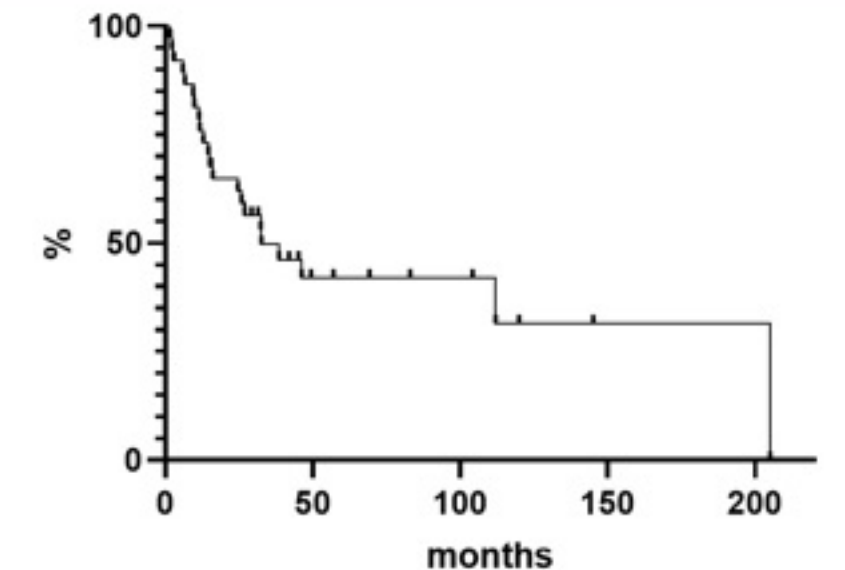

Supplement: BLOODA_ADV-2023-010742-mmc1.pdf [file BLOODA_ADV-2023-010742-mmc1.pdf]
